# Supplementary material for: A mutation in mouse Krüppel-like factor 15 alters the gut microbiome and response to obesogenic diet
Source: PubMed Central journal article supplement (PMC6760833; doi:10.1371/journal.pone.0222536), 2019-09-25

Fig S1

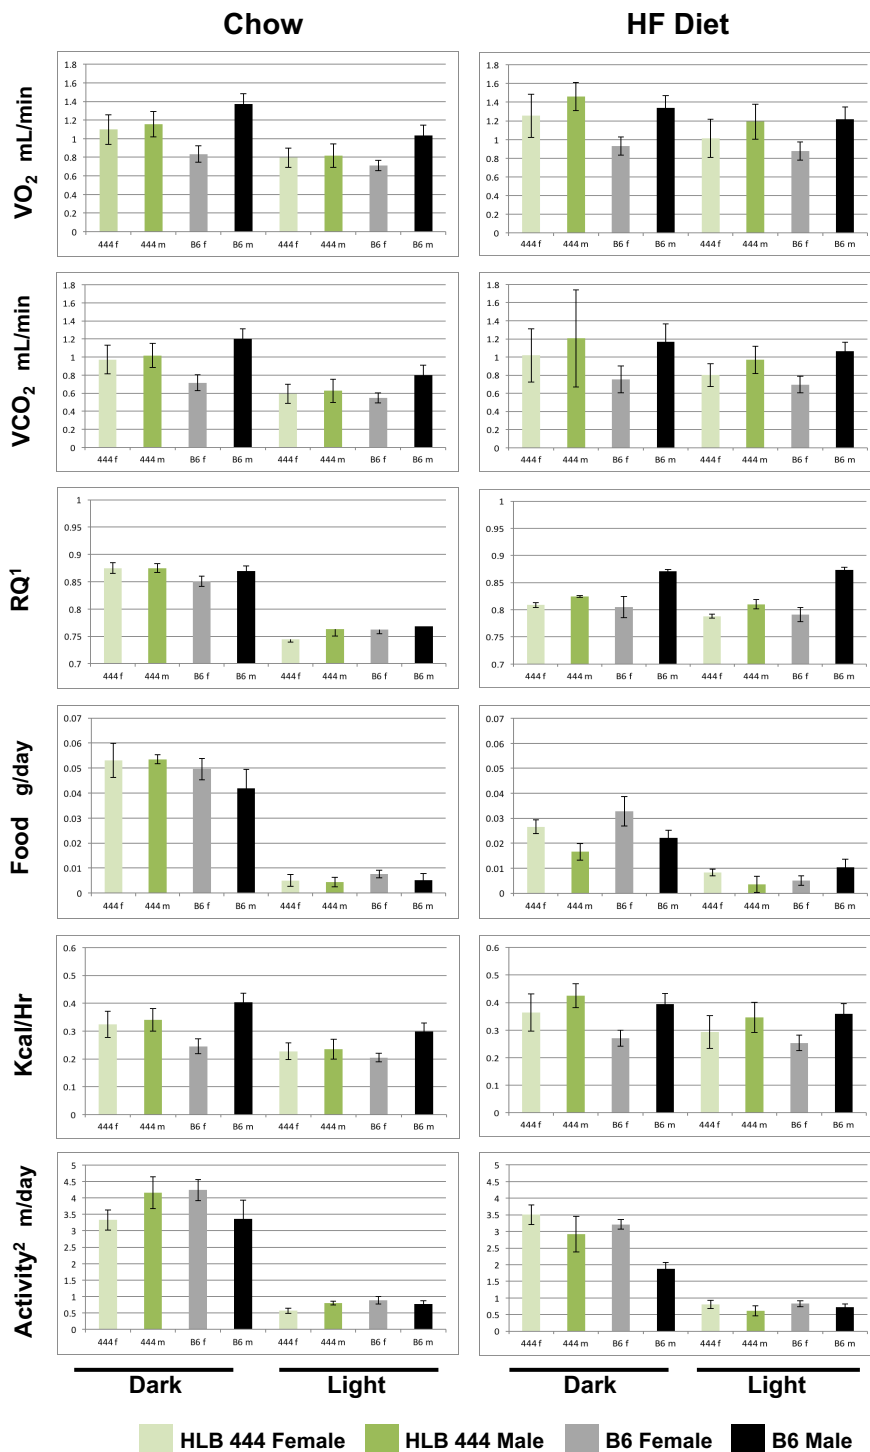

Supplement: pone.0222536.s001.pdf [file pone.0222536.s001.pdf]
