# Supplementary material for: A mutation in mouse Krüppel-like factor 15 alters the gut microbiome and response to obesogenic diet
Source: PLOS journal article supplement (doi:10.1371/journal.pone.0222536), 2019-09-25
Supplement: S7 (10.1371/journal.pone.0222536.s007) [file journal.pone.0222536.s007]

**Table S3. Descriptive Statistics for 16S Data**

|                                    | B6                  |                     |                     |                     |                     | HLB                 |                     |                     |                     |                     |
|------------------------------------|---------------------|---------------------|---------------------|---------------------|---------------------|---------------------|---------------------|---------------------|---------------------|---------------------|
|                                    | T0                  | T1*                 | T2*                 | T3*                 | TT                  | T0                  | T1*                 | T2*                 | T3*                 | TT                  |
| <b>N</b>                           | <b>7</b>            | <b>6</b>            | <b>7</b>            | <b>7</b>            | <b>7</b>            | <b>11</b>           | <b>10</b>           | <b>8</b>            | <b>11</b>           | <b>10</b>           |
| <b>Mean read depth/sample ± SD</b> | <b>17463 ± 3117</b> | <b>18432 ± 1457</b> | <b>21592 ± 6929</b> | <b>20789 ± 2020</b> | <b>19336 ± 2335</b> | <b>19428 ± 3082</b> | <b>17966 ± 1747</b> | <b>19671 ± 1894</b> | <b>19464 ± 2250</b> | <b>17704 ± 2546</b> |
| <b>Mean # OTUs/sample ± SD</b>     | <b>166 ± 16</b>     | <b>187 ± 7</b>      | <b>156 ± 10</b>     | <b>146 ± 11</b>     | <b>129 ± 13</b>     | <b>153 ± 30</b>     | <b>201 ± 12</b>     | <b>189 ± 5</b>      | <b>178 ± 9</b>      | <b>154 ± 11</b>     |

*\*not used in most analyses.* Sample count for each genotype by time point along with mean read depth per sample and mean number of OTUs per sample ± standard deviation. There were not large community differences between T1 and T3, thus all analyses were performed on T0 and TT.
